# Supplementary material for: Effects of Arctic sea-ice concentration on turbulent surface fluxes in four atmospheric reanalyses
Source: Copernicus journal article supplement (doi:10.5194/egusphere-2023-1131), 2023-07-06

1980-2000: 84 °N, 168 °W

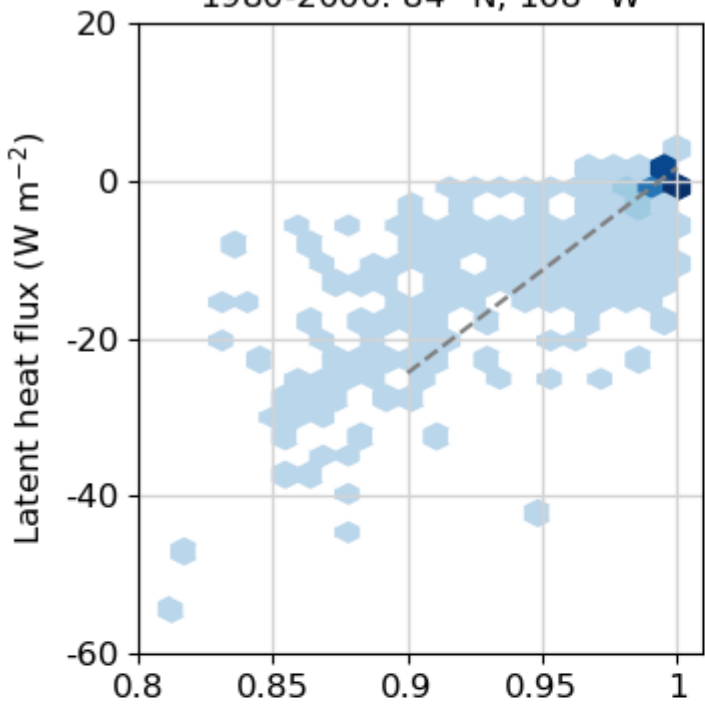

1980-2000: 84 °N, 172 °W

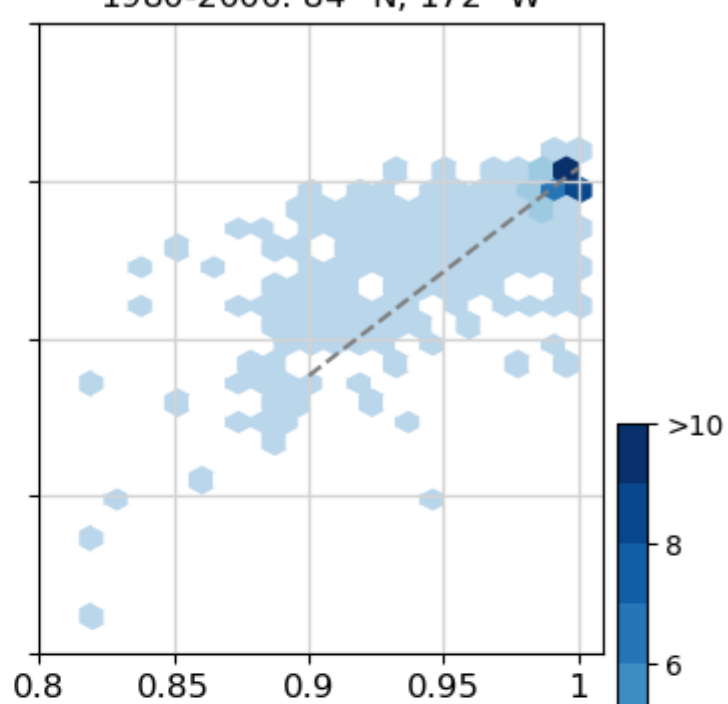

2001-2021: 84 °N, 168 °W

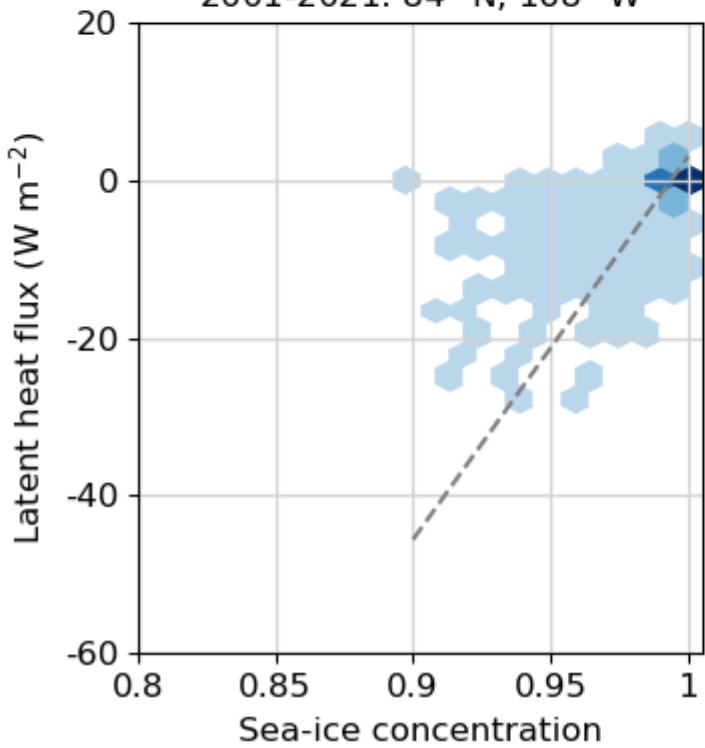

2001-2021: 84 °N, 172 °W

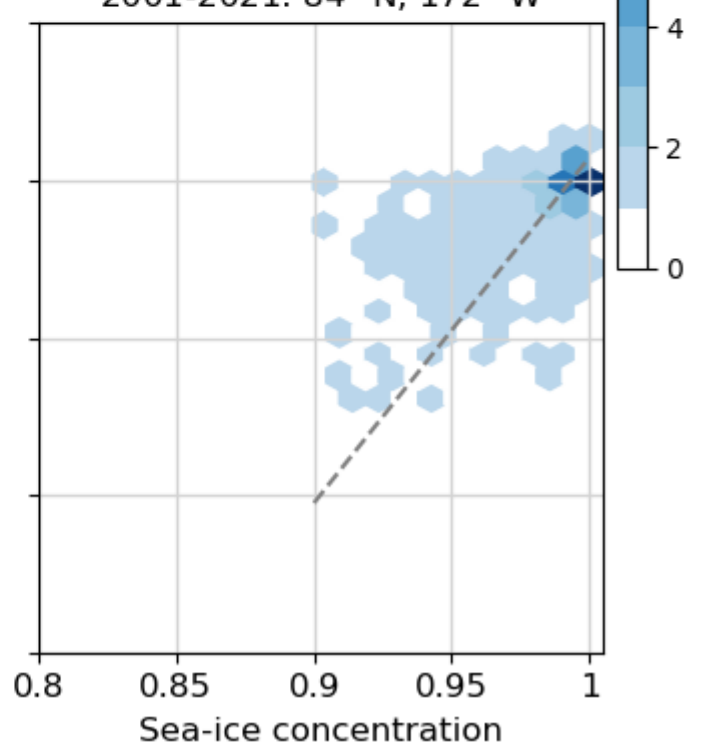

Supplement: Supplementary file [file egusphere-2023-1131-AC2-supplement.pdf]
